# Supplementary material for: Quality of Life and Psychological Disorders in Coeliac Disease: A Prospective Multicentre Study
Source: MDPI journal article supplement (doi:10.3390/nu13093233), 2021-09-16
Supplement: s1 [file s1]

Supp Table S1. Changes in the number of GI and EI symptoms considering follow-ups at T1 and T2

|             |               | T1-T0 (n=93)     |               | T2-T0 (n=55)     | T1-T0 (n=55)     | T2-T1 (n=55)     |
|-------------|---------------|------------------|---------------|------------------|------------------|------------------|
|             |               | n° patients (%)  |               | n° patients (%)  | n° patients (%)  | n° patients (%)  |
| GI symptoms | reduction     | <b>68 (73,1)</b> | reduction     | <b>37 (67,3)</b> | <b>42 (76,4)</b> | <b>9 (16,4)</b>  |
|             | no difference | 17 (18,3)        | no difference | 13 (23,6)        | 8 (14,5)         | 29 (52,7)        |
|             | increase      | 8 (8,6)          | increase      | 5 (9,1)          | 5 (9,1)          | 17 (30,9)        |
| EI symptoms | reduction     | <b>75 (80,7)</b> | reduction     | <b>45 (81,8)</b> | <b>44 (80,0)</b> | <b>16 (29,1)</b> |
|             | no difference | 14 (15,1)        | no difference | 9 (16,4)         | 9 (16,4)         | 28 (50,9)        |
|             | increase      | 4 (4,2)          | increase      | 1 (1,8)          | 2 (3,6)          | 11 (20,0)        |

Supp Table S2. Stratified analysis considering the type of CeD and adherence to a GFD (T0-T1)

|        | Classical (n=46)           |        |                                      |             |        |                                      | p-value*     |
|--------|----------------------------|--------|--------------------------------------|-------------|--------|--------------------------------------|--------------|
|        | T0                         |        |                                      | T1          |        |                                      |              |
|        | min-max                    | median | 1 <sup>st</sup> -3 <sup>rd</sup> qu. | min-max     | median | 1 <sup>st</sup> -3 <sup>rd</sup> qu. |              |
| BDI    | 0.0-38.0                   | 11.0   | 5.0-18.0                             | 0.0-29.0    | 6.0    | 3.0-15.0                             | <b>0.009</b> |
| STAY 1 | 21.0-75.0                  | 42.0   | 35.0-52.0                            | 21.0-65.0   | 34.0   | 29.0-45.5                            | <b>0.008</b> |
| STAY 2 | 23.0-74.0                  | 44.0   | 37.0-50.0                            | 20.0-72.0   | 38.0   | 32.5-50.5                            | <b>0.005</b> |
| HADS-A | 0.0-20.0                   | 8.0    | 5.0-12.8                             | 1.0-19.0    | 6.0    | 3.3-10.0                             | <b>0.014</b> |
| HADS-D | 2.0-20.0                   | 6.0    | 4.0-9.0                              | 1.0-14.0    | 5.0    | 3.0-8.0                              | 0.166        |
| SF36   | 35.5-742.0                 | 386.8  | 280.5-542.0                          | 152.0-764.0 | 579.0  | 390.8-700.2                          | <b>0.002</b> |
|        | Non-classical (n=47)       |        |                                      |             |        |                                      | p-value*     |
|        | T0                         |        |                                      | T1          |        |                                      |              |
|        | min-max                    | median | 1 <sup>st</sup> -3 <sup>rd</sup> qu. | min-max     | median | 1 <sup>st</sup> -3 <sup>rd</sup> qu. |              |
| BDI    | 0.0-33.0                   | 8.0    | 4.0-14.5                             | 0.0-38.0    | 7.0    | 2.0-9.8                              | <b>0.023</b> |
| STAY 1 | 23.0-70.0                  | 38.0   | 31.0-48.0                            | 22.0-73.0   | 36.0   | 29.0-44.3                            | 0.608        |
| STAY 2 | 27.0-73.0                  | 42.0   | 33.0-52.0                            | 24.0-71.0   | 39.0   | 32.3-47.8                            | 0.206        |
| HADS-A | 2.0-16.0                   | 6.0    | 4.0-9.0                              | 0.0-18.0    | 6.0    | 3.3-9.0                              | 0.353        |
| HADS-D | 1.0-16.0                   | 5.0    | 3.5-7.0                              | 1.0-15.0    | 4.0    | 3.0-6.0                              | 0.068        |
| SF36   | 117.0-764.0                | 523.8  | 351.4-628.5                          | 133.0-772.0 | 593.4  | 510.7-658.4                          | <b>0.008</b> |
|        | Adherent to GFD (n=78)     |        |                                      |             |        |                                      | p-value*     |
|        | T0                         |        |                                      | T1          |        |                                      |              |
|        | min-max                    | median | 1 <sup>st</sup> -3 <sup>rd</sup> qu. | min-max     | median | 1 <sup>st</sup> -3 <sup>rd</sup> qu. |              |
| BDI    | 0.0-38.0                   | 10.0   | 5.0-16.0                             | 0.0-38.0    | 6.0    | 2.0-13.0                             | <b>0.000</b> |
| STAY 1 | 21.0-75.0                  | 38.0   | 33.0-50.0                            | 21.0-73.0   | 35.0   | 29.0-41.8                            | <b>0.005</b> |
| STAY 2 | 23.0-73.0                  | 43.0   | 35.3-51.8                            | 20.0-71.0   | 38.0   | 32.0-48.0                            | <b>0.001</b> |
| HADS-A | 0.0-20.0                   | 7.0    | 4.3-11.0                             | 0.0-18.0    | 6.0    | 3.0-9.0                              | <b>0.003</b> |
| HADS-D | 1.0-20.0                   | 5.0    | 4.0-8.0                              | 1.0-15.0    | 4.0    | 3.0-7.0                              | <b>0.007</b> |
| SF36   | 35.5-764.0                 | 423.6  | 319.9-573.2                          | 133.0-772.0 | 594.3  | 467.1-689.5                          | <b>0.000</b> |
|        | Non adherent to GFD (n=12) |        |                                      |             |        |                                      | p-value*     |
|        | T0                         |        |                                      | T1          |        |                                      |              |
|        | min-max                    | median | 1 <sup>st</sup> -3 <sup>rd</sup> qu. | min-max     | median | 1 <sup>st</sup> -3 <sup>rd</sup> qu. |              |
| BDI    | 0.0-25.0                   | 8.0    | 4.5-17.0                             | 0-29.0      | 9.5    | 6.8-13.5                             | 0.759        |
| STAY 1 | 24.0-62.0                  | 42.5   | 38.3-46.5                            | 29-65.0     | 44.0   | 32.0-53.0                            | 0.823        |
| STAY 2 | 31.0-74.0                  | 43.0   | 36.5-46.5                            | 29-72.0     | 39.5   | 36.5-53.5                            | 0.688        |
| HADS-A | 2.0-17.0                   | 9.0    | 5.8-10.3                             | 0-19.0      | 9.5    | 5.5-11.3                             | 0.438        |
| HADS-D | 3.0-11.0                   | 6.0    | 4.0-6.3                              | 2-13.0      | 6.0    | 5.0-7.0                              | 0.384        |
| SF36   | 177.3-681.0                | 633.0  | 495.4-649.8                          | 244.3-771.0 | 579.2  | 492.1-685.0                          | 0.831        |

\* Wilcoxon test

Supp Table S3. Stratified analysis considering sex and age (T0-T1)

|        | Males (n=17)   |        |                                      |             |        |                                      | p-value*     |
|--------|----------------|--------|--------------------------------------|-------------|--------|--------------------------------------|--------------|
|        | T0             |        |                                      | T1          |        |                                      |              |
|        | min-max        | median | 1 <sup>st</sup> -3 <sup>rd</sup> qu. | min-max     | median | 1 <sup>st</sup> -3 <sup>rd</sup> qu. |              |
| BDI    | 0.0-28.0       | 8.0    | 4.0-11.0                             | 0.0-38.0    | 6.0    | 0.0-13.0                             | 0.675        |
| STAY 1 | 24.0-63.0      | 38.0   | 34.0-43.0                            | 23.0-73.0   | 30.0   | 29.0-40.5                            | 0.232        |
| STAY 2 | 24.0-66.0      | 41.0   | 35.0-44.0                            | 20.0-71.0   | 34.0   | 32.0-49.0                            | 0.393        |
| HADS-A | 0.0-13.0       | 6.0    | 3.0-8.0                              | 0.0-18.0    | 4.0    | 1.0-8.0                              | 0.465        |
| HADS-D | 2.0-16.0       | 5.0    | 3.0-8.0                              | 1.0-14.0    | 5.0    | 3.0-6.0                              | 0.584        |
| SF36   | 161.5-764.0    | 497.7  | 326.0-656.7                          | 133.0-749.0 | 659.0  | 464.2-710.0                          | 0.207        |
|        | Females (n=76) |        |                                      |             |        |                                      | p-value*     |
|        | T0             |        |                                      | T1          |        |                                      |              |
|        | min-max        | median | 1 <sup>st</sup> -3 <sup>rd</sup> qu. | min-max     | median | 1 <sup>st</sup> -3 <sup>rd</sup> qu. |              |
| BDI    | 0.0-38.0       | 10.0   | 5.0-17.8                             | 0.0-37.0    | 6.0    | 3.0-13.5                             | <b>0.000</b> |
| STAY 1 | 21.0-75.0      | 39.0   | 32.5-50.0                            | 21.0-65.0   | 36.0   | 29.0-45.5                            | <b>0.047</b> |
| STAY 2 | 23.0-74.0      | 44.0   | 34.5-52.0                            | 22.0-72.0   | 39.0   | 33.0-48.3                            | <b>0.006</b> |
| HADS-A | 0.0-20.0       | 7.0    | 5.0-11.3                             | 0.0-19.0    | 6.0    | 4.0-10.0                             | <b>0.026</b> |
| HADS-D | 1.0-20.0       | 6.0    | 4.0-8.0                              | 2.0-15.0    | 4.0    | 3.0-7.0                              | <b>0.023</b> |
| SF36   | 35.5-742.0     | 467.0  | 330.2-578.8                          | 187.0-772.0 | 580.2  | 472.1-668.0                          | <b>0.000</b> |
|        | 16-34 (n=39)   |        |                                      |             |        |                                      | p-value*     |
|        | T0             |        |                                      | T1          |        |                                      |              |
|        | min-max        | median | 1 <sup>st</sup> -3 <sup>rd</sup> qu. | min-max     | median | 1 <sup>st</sup> -3 <sup>rd</sup> qu. |              |
| BDI    | 0.0-33.0       | 11.0   | 5.0-16.5                             | 0.0-37.0    | 7.0    | 1.0-12.5                             | <b>0.004</b> |
| STAY 1 | 24.0-75.0      | 40.5   | 30.0-52.0                            | 22.0-65.0   | 36.0   | 29.0-45.0                            | 0.088        |
| STAY 2 | 27.0-73.0      | 43.0   | 40.0-52.0                            | 24.0-63.0   | 41.0   | 32.5-49.0                            | 0.137        |
| HADS-A | 2.0-18.0       | 8.0    | 4.0-12.0                             | 0.0-19.0    | 6.0    | 2.5-10.0                             | <b>0.025</b> |
| HADS-D | 2.0-14.0       | 5.0    | 3.0-8.0                              | 1.0-15.0    | 4.0    | 3.0-7.0                              | 0.109        |
| SF36   | 142.5-764.0    | 484.3  | 341.2-590.2                          | 202.5-772.0 | 582.8  | 470.7-696.1                          | <b>0.023</b> |
|        | 35+ (n=54)     |        |                                      |             |        |                                      | p-value*     |
|        | T0             |        |                                      | T1          |        |                                      |              |
|        | min-max        | median | 1 <sup>st</sup> -3 <sup>rd</sup> qu. | min-max     | median | 1 <sup>st</sup> -3 <sup>rd</sup> qu. |              |
| BDI    | 0.0-38.0       | 8.0    | 4.0-14.8                             | 0.0-38.0    | 6.0    | 3.0-14.0                             | <b>0.033</b> |
| STAY 1 | 21.0-72.0      | 38.5   | 34.3-45.5                            | 21.0-73.0   | 36.0   | 30.0-44.0                            | 0.116        |
| STAY 2 | 23.0-74.0      | 43.0   | 35.0-50.0                            | 20.0-72.0   | 38.0   | 32.3-48.5                            | <b>0.014</b> |
| HADS-A | 0.0-20.0       | 7.0    | 5.0-10.0                             | 1.0-18.0    | 5.0    | 4.0-10.0                             | 0.259        |
| HADS-D | 1.0-20.0       | 6.0    | 4.0-7.8                              | 1.0-14.0    | 5.0    | 3.0-7.0                              | 0.118        |
| SF36   | 35.5-742.0     | 467.0  | 326.0-576.5                          | 133.0-764.0 | 611.5  | 453.1-679.0                          | <b>0.001</b> |

\* Wilcoxon test

Supp Table S4. Delta T1-T0 stratified

|        | Males (N=17)           |        |                     | Females (N=76)             |        |                     | p-value*     |
|--------|------------------------|--------|---------------------|----------------------------|--------|---------------------|--------------|
|        | 1 <sup>st</sup> qu.    | median | 3 <sup>rd</sup> qu. | 1 <sup>st</sup> qu.        | median | 3 <sup>rd</sup> qu. |              |
| BDI    | -4.0                   | 0.0    | 2.0                 | -7.0                       | -3.0   | 1.0                 | 0.311        |
| STAY 1 | -10.0                  | -3.0   | 4.0                 | -9.8                       | -2.0   | 3.0                 | 0.836        |
| STAY 2 | -10.0                  | -3.0   | 5.0                 | -10.0                      | -2.0   | 1.0                 | 0.668        |
| HADS-A | -2.0                   | -2.0   | 2.0                 | -3.5                       | -1.0   | 1.5                 | 0.908        |
| HADS-D | -4.0                   | -1.0   | 3.0                 | -3.0                       | -1.0   | 1.0                 | 0.724        |
| SF36   | -65.0                  | 57.0   | 155.0               | -18.4                      | 53.2   | 174.8               | 0.727        |
|        | 16-34 (n=39)           |        |                     | 35+ (n=54)                 |        |                     | p-value*     |
|        | 1 <sup>st</sup> qu.    | median | 3 <sup>rd</sup> qu. | 1 <sup>st</sup> qu.        | median | 3 <sup>rd</sup> qu. |              |
| BDI    | -7.5                   | -3.0   | 1.5                 | -5.0                       | -3.0   | 1.0                 | 0.358        |
| STAY 1 | -14.5                  | -3.0   | 3.8                 | -9.0                       | -2.0   | 3.0                 | 0.364        |
| STAY 2 | -10.0                  | -2.0   | 2.0                 | -10.0                      | -2.0   | 1.0                 | 0.614        |
| HADS-A | -4.5                   | -2.0   | 1.5                 | -3.0                       | 0.0    | 2.0                 | 0.272        |
| HADS-D | -3.5                   | -1.0   | 1.0                 | -3.0                       | -0.5   | 1.3                 | 0.990        |
| SF36   | -31.8                  | 27.3   | 153.9               | -3.6                       | 71.8   | 178.0               | 0.596        |
|        | Classical (n=46)       |        |                     | Non classical (n=47)       |        |                     | p-value*     |
|        | 1 <sup>st</sup> qu.    | median | 3 <sup>rd</sup> qu. | 1 <sup>st</sup> qu.        | median | 3 <sup>rd</sup> qu. |              |
| BDI    | -7.0                   | -3.0   | 1.0                 | -5.0                       | -3.0   | 1.8                 | 0.613        |
| STAY 1 | -11.0                  | -4.0   | 1.0                 | -9.3                       | -0.5   | 9.0                 | 0.158        |
| STAY 2 | -10.0                  | -3.0   | 0.8                 | -8.5                       | -2.0   | 3.0                 | 0.260        |
| HADS-A | -5.8                   | -2.0   | 2.0                 | -2.0                       | 0.0    | 1.0                 | 0.113        |
| HADS-D | -3.0                   | 0.0    | 2.0                 | -3.8                       | -1.0   | 1.0                 | 0.930        |
| SF36   | -15.9                  | 125.9  | 223.0               | -27.8                      | 35.9   | 133.5               | 0.265        |
|        | Adherent to GFD (N=78) |        |                     | Not adherent to GFD (N=12) |        |                     | p-value*     |
|        | 1 <sup>st</sup> qu.    | median | 3 <sup>rd</sup> qu. | 1 <sup>st</sup> qu.        | median | 3 <sup>rd</sup> qu. |              |
| BDI    | -7.0                   | -3.5   | 1.0                 | -2.5                       | 1.0    | 3.5                 | 0.058        |
| STAY 1 | -10.0                  | -3.0   | 3.0                 | -6.5                       | 1.0    | 7.5                 | 0.189        |
| STAY 2 | -10.0                  | -3.0   | 1.0                 | -2.0                       | 1.0    | 3.5                 | 0.099        |
| HADS-A | -4.0                   | -1.0   | 1.0                 | -0.5                       | 1.0    | 2.0                 | <b>0.050</b> |
| HADS-D | -3.8                   | -1.0   | 1.0                 | -0.3                       | 1.0    | 3.0                 | 0.062        |
| SF36   | -14.3                  | 57.0   | 202.3               | -99.8                      | -68.8  | 93.9                | <b>0.029</b> |

\* Mann-Whitney test

Supp Table S5. multiple comparisons between T0, T1 and T2 (n=55)

|        | T0     |                                      | T1     |                                      | T2     |                                      | T0-T1        | T1-T2        | T0-T2        |
|--------|--------|--------------------------------------|--------|--------------------------------------|--------|--------------------------------------|--------------|--------------|--------------|
|        | Median | 1 <sup>st</sup> -3 <sup>rd</sup> Qu. | Median | 1 <sup>st</sup> -3 <sup>rd</sup> Qu. | Median | 1 <sup>st</sup> -3 <sup>rd</sup> Qu. | p-value*     | P-value*     | P-value*     |
| BDI    | 8,0    | 5,0-16,5                             | 6,0    | 2,0-11                               | 4,0    | 1,0-8,0                              | <b>0.003</b> | 0.060        | <b>0.000</b> |
| STAY 1 | 38,0   | 31,0-50,5                            | 34,0   | 28,0-41,8                            | 32,0   | 28,0-39,0                            | 0.144        | <b>0.015</b> | <b>0.000</b> |
| STAY 2 | 43,0   | 34,0-51,5                            | 38,0   | 31,8-45,8                            | 36,5   | 30,3-44,0                            | 0.063        | <b>0.006</b> | <b>0.000</b> |
| HADS-A | 7,0    | 4,0-11,0                             | 4,5    | 3,0-8,8                              | 4,0    | 3,0-7,0                              | <b>0.030</b> | 0.204        | <b>0.000</b> |
| HADS-D | 5,0    | 4,0-8,0                              | 4,0    | 3,0-7,0                              | 4,0    | 3,0-6,8                              | <b>0.045</b> | 1.000        | <b>0.003</b> |
| SF36   | 417,8  | 294,8-560,5                          | 608,2  | 472,8-696,5                          | 612,8  | 480,7-704,2                          | <b>0.000</b> | 0.141        | <b>0.000</b> |

\* Wilcoxon test; p-values adjusted (Dunn-Bonferroni) for multiple comparison
